# Supplementary material for: Route effects in city-based survey knowledge estimates
Source: Springer Nature journal article supplement (doi:10.1007/s10339-022-01122-0), 2023-01-23
Supplement: MOESM1 [file 23947734]

# Appendix A

anonymised

## **Summary statistics**

Table 1: Average pointing and sketchmapping errors to all locations analysed in Experiments 1 and 2.

| location | landmark        | Absolute error   |                   |                  | Circular error    |                  |                   |
|----------|-----------------|------------------|-------------------|------------------|-------------------|------------------|-------------------|
|          |                 | pointing: M (SD) | sketchmap: M (SD) | pointing: M (SD) | sketchmap: M (SD) | pointing: M (SD) | sketchmap: M (SD) |
| A        | A-Brillux       | 55.07 (37.77)    | 63.66 (37.97)     | -45.07 (49.63)   | -35.31 (65.93)    | -45.07 (49.63)   | -35.31 (65.93)    |
|          | A-Himmelreich   | 23.3 (41.44)     | 36.91 (45.94)     | 4.96 (47.54)     | -7.73 (58.95)     | 4.96 (47.54)     | -7.73 (58.95)     |
|          | A-Sparkasse     | 55.65 (41.57)    | 49.96 (44.96)     | -20.17 (67.38)   | -7.04 (67.63)     | -20.17 (67.38)   | -7.04 (67.63)     |
|          | A-Zoo           | 43.57 (37.28)    | 40.82 (38.31)     | 15.57 (55.74)    | 14.32 (54.62)     | 15.57 (55.74)    | 14.32 (54.62)     |
| B        | B-BekanntFarbe  | 20.17 (28.46)    | 18.62 (35.33)     | -15 (31.59)      | -5.17 (39.74)     | -15 (31.59)      | -5.17 (39.74)     |
|          | B-Boeselburg    | 27.52 (50.8)     | 31.52 (47.75)     | -9.2 (57.29)     | -13.28 (55.96)    | -9.2 (57.29)     | -13.28 (55.96)    |
|          | B-Moevenpick    | 42.58 (37.93)    | 40.79 (38.95)     | -19.33 (54.23)   | -18.88 (53.68)    | -19.33 (54.23)   | -18.88 (53.68)    |
|          | B-Wasserturm    | 46.65 (32.41)    | 44.2 (40.41)      | -6.75 (57.39)    | -14.3 (58.94)     | -6.75 (57.39)    | -14.3 (58.94)     |
| C        | C-Cineplex      | 47.76 (45.69)    | 57.12 (51.99)     | -32.48 (58.01)   | -23.96 (74.22)    | -32.48 (58.01)   | -23.96 (74.22)    |
|          | C-Ludgeriplatz  | 33.92 (40.71)    | 36.52 (39.84)     | 3.68 (53.31)     | 2.12 (54.51)      | 3.68 (53.31)     | 2.12 (54.51)      |
|          | C-Suedpark      | 44.09 (35.41)    | 43.81 (43.99)     | -7 (56.91)       | 4.29 (62.7)       | -7 (56.91)       | 4.29 (62.7)       |
|          | C-Verlag        | 24.89 (24.51)    | 33.79 (46.37)     | -1.53 (35.39)    | -6.21 (57.57)     | -1.53 (35.39)    | -6.21 (57.57)     |
| D        | D-Brasserie     | 24.68 (22.6)     | 24.37 (27.74)     | -12.89 (31.14)   | 0.89 (37.22)      | -12.89 (31.14)   | 0.89 (37.22)      |
|          | D-Gleis22       | 19.25 (30.48)    | 25.33 (34.92)     | 11.46 (34.3)     | 16.81 (39.9)      | 11.46 (34.3)     | 16.81 (39.9)      |
|          | D-HotJazzClub   | 12.89 (11.54)    | 26.75 (30.93)     | -3.75 (17.06)    | -15.32 (38.15)    | -3.75 (17.06)    | -15.32 (38.15)    |
|          | D-SputnikHalle  | 12.48 (12.2)     | 32.74 (31.33)     | -1 (17.6)        | -10.81 (44.42)    | -1 (17.6)        | -10.81 (44.42)    |
| E        | E-Bauhaus       | 57.35 (48.7)     | 45.95 (45.96)     | -26.75 (71.28)   | -20.25 (62.48)    | -26.75 (71.28)   | -20.25 (62.48)    |
|          | E-Hafenkaeserei | 43.04 (30.01)    | 43.36 (40.26)     | -37.32 (37.11)   | 0.14 (59.75)      | -37.32 (37.11)   | 0.14 (59.75)      |
|          | E-MrWash        | 55.12 (40.58)    | 44.06 (36.71)     | 8.38 (69.38)     | 30.56 (49.22)     | 8.38 (69.38)     | 30.56 (49.22)     |
|          | E-StJoseph      | 53.33 (41.28)    | 43.71 (39.12)     | -40.76 (54.28)   | -11.62 (58.27)    | -40.76 (54.28)   | -11.62 (58.27)    |
| F        | F-Franziskus    | 42.55 (37.13)    | 32.9 (26.35)      | -11.25 (56.14)   | 8 (42.03)         | -11.25 (56.14)   | 8 (42.03)         |
|          | F-HBF           | 24.52 (19.74)    | 36.76 (44.28)     | -10.66 (29.91)   | 24.83 (52.17)     | -10.66 (29.91)   | 24.83 (52.17)     |

| F    | location | landmark      | Absolute error   |                   |                  | Circular error    |                  |                   |
|------|----------|---------------|------------------|-------------------|------------------|-------------------|------------------|-------------------|
|      |          |               | pointing: M (SD) | sketchmap: M (SD) | pointing: M (SD) | sketchmap: M (SD) | pointing: M (SD) | sketchmap: M (SD) |
|      |          | F-Marktkauf   | 49.86 (33.39)    | 56.17 (38.86)     | 18.32 (58.04)    | 14.87 (67.66)     |                  |                   |
|      |          | F-RoteLolaPub | 9 (8.56)         | 24.29 (37.88)     | -3.71 (11.96)    | 10.86 (43.87)     |                  |                   |
| Exp1 |          | Exp1-Aral     | 23.88 (28.68)    | 28.27 (29.73)     | -10.16 (36.03)   | -4.64 (40.94)     |                  |                   |
|      |          | Exp1-ilDivino | 30.83 (29.85)    | 42.95 (37.33)     | 16.83 (39.62)    | 18.74 (53.97)     |                  |                   |
|      |          | Exp1-Mensa    | 21.36 (20.15)    | 24.39 (34.69)     | -3.67 (29.27)    | -5.72 (42.14)     |                  |                   |
|      |          | Exp1-Tormin   | 33.71 (18.55)    | 40.38 (27.29)     | 0.22 (38.73)     | 14.49 (46.82)     |                  |                   |

Table 2: Angular deviation of each route with regard to each target. All targets are listed together with the possible route choices and the number of participants who selected that route. This table can be matched with the subsequent map visualisations in order to understand which route ID corresponded to which street on the map.

| location       | landmark      | route ID       | angular deviation | how often chosen |    |
|----------------|---------------|----------------|-------------------|------------------|----|
| A              | A-Brillux     | 1              | -157              | 6                |    |
|                |               | 2              | 10                | 7                |    |
|                |               | 3              | -37               | 16               |    |
|                | A-Himmelreich | 1              | 3                 | 21               |    |
|                |               | 2              | 179               | 2                |    |
|                |               | 3              | 122               | 0                |    |
|                | A-Sparkasse   | 1              | -101              | 9                |    |
|                |               | 2              | 72                | 2                |    |
|                |               | 3              | -16               | 12               |    |
|                | A-Zoo         | 1              | 119               | 11               |    |
|                |               | 2              | -64               | 16               |    |
|                |               | 3              | -125              | 1                |    |
|                | B             | B-BekanntFarbe | 1                 | -1               | 28 |
|                |               |                | 2                 | 166              | 1  |
|                |               |                | 3                 | 87               | 0  |
| B-Boeselburg   |               | 1              | -160              | 3                |    |
|                |               | 2              | 13                | 21               |    |
|                |               | 3              | -64               | 1                |    |
| B-Moevenpick   |               | 1              | 115               | 4                |    |
|                |               | 2              | -75               | 19               |    |
|                |               | 3              | -155              | 1                |    |
| B-Wasserturm   |               | 1              | -80               | 8                |    |
|                |               | 2              | 92                | 3                |    |
|                |               | 3              | 9                 | 9                |    |
| C-Cineplex     |               | 1              | -111              | 23               |    |
|                |               | 2              | 70                | 2                |    |
| C-Ludgeriplatz |               | 1              | 45                | 23               |    |
|                | 2             | -134           | 2                 |                  |    |
| C-Suedpark     | 1             | 136            | 5                 |                  |    |
|                | 2             | -42            | 17                |                  |    |

| location | landmark        | route ID | angular deviation | how often chosen |
|----------|-----------------|----------|-------------------|------------------|
|          | C-Verlag        | 1        | -36               | 18               |
|          |                 | 2        | 140               | 1                |
| D        | D-Brasserie     | 1        | 10                | 28               |
|          |                 | 2        | 156               | 0                |
|          | D-Gleis22       | 1        | 47                | 27               |
|          |                 | 2        | -179              | 1                |
|          | D-HotJazzClub   | 1        | -61               | 2                |
|          |                 | 2        | 26                | 26               |
|          | D-SputnikHalle  | 1        | -165              | 1                |
|          |                 | 2        | -30               | 26               |
| E        | E-Bauhaus       | 1        | 53                | 1                |
|          |                 | 2        | 83                | 0                |
|          |                 | 3        | -83               | 19               |
|          | E-Hafenkaeserei | 1        | 115               | 0                |
|          |                 | 2        | 145               | 0                |
|          |                 | 3        | -18               | 28               |
|          | E-MrWash        | 1        | -107              | 0                |
|          |                 | 2        | -67               | 0                |
|          |                 | 3        | -117              | 16               |
|          | E-StJoseph      | 1        | -160              | 0                |
|          |                 | 2        | -130              | 0                |
|          |                 | 3        | 60                | 21               |
| F        | F-Franziskus    | 1        | -100              | 18               |
|          |                 | 2        | 84                | 1                |
|          |                 | 3        | 175               | 1                |
|          | F-HBF           | 1        | -36               | 27               |
|          |                 | 2        | 147               | 1                |
|          |                 | 3        | -114              | 1                |
|          | F-Marktkauf     | 1        | 113               | 17               |
|          |                 | 2        | -57               | 1                |
|          |                 | 3        | 39                | 4                |
|          | F-RoteLolaPub   | 1        | 4                 | 27               |
|          |                 | 2        | -161              | 0                |
|          |                 | 3        | -68               | 1                |
|          |                 | 1        | 66                | 35               |

| Exp1ion | Exp1-Ark1     | route ID | angular deviation | how often chosen |
|---------|---------------|----------|-------------------|------------------|
|         |               | 2        | 154               | 1                |
|         |               | 3        | -116              | 21               |
|         | Exp1-ilDivino | 1        | -38               | 21               |
|         |               | 2        | 45                | 35               |
|         |               | 3        | 135               | 3                |
|         | Exp1-Mensa    | 1        | 144               | 1                |
|         |               | 2        | -125              | 1                |
|         |               | 3        | -38               | 57               |
|         | Exp1-Tormin   | 1        | -95               | 8                |
|         |               | 2        | -9                | 24               |
|         |               | 3        | 79                | 25               |

## Map visualisations

Raw data visualized landmark-by-landmark, for each location on a separate page. Lines in circular plots indicate the correct direction to the given landmark.

# Location ID: Exp1

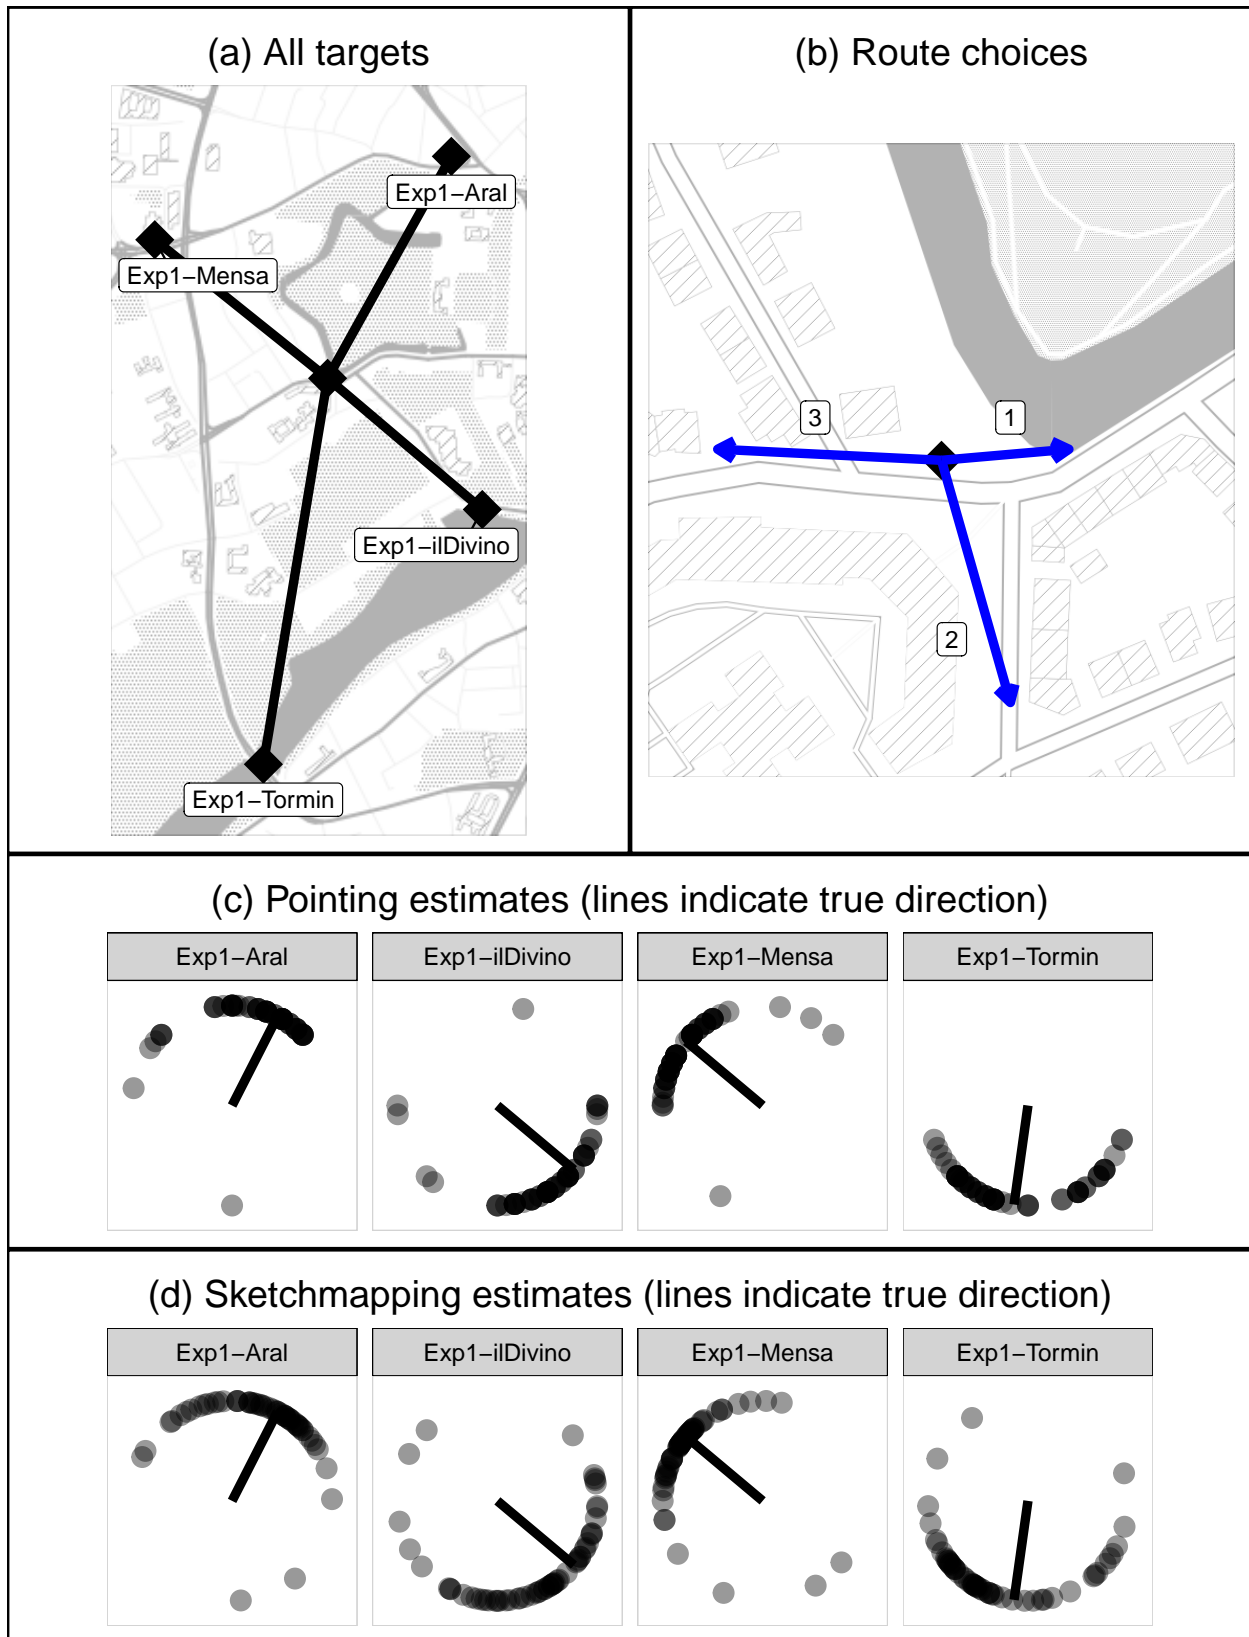

Map tiles by Stamen Design, under CC BY 3.0. Data by OpenStreetMap, under ODbL.



# Location ID: A

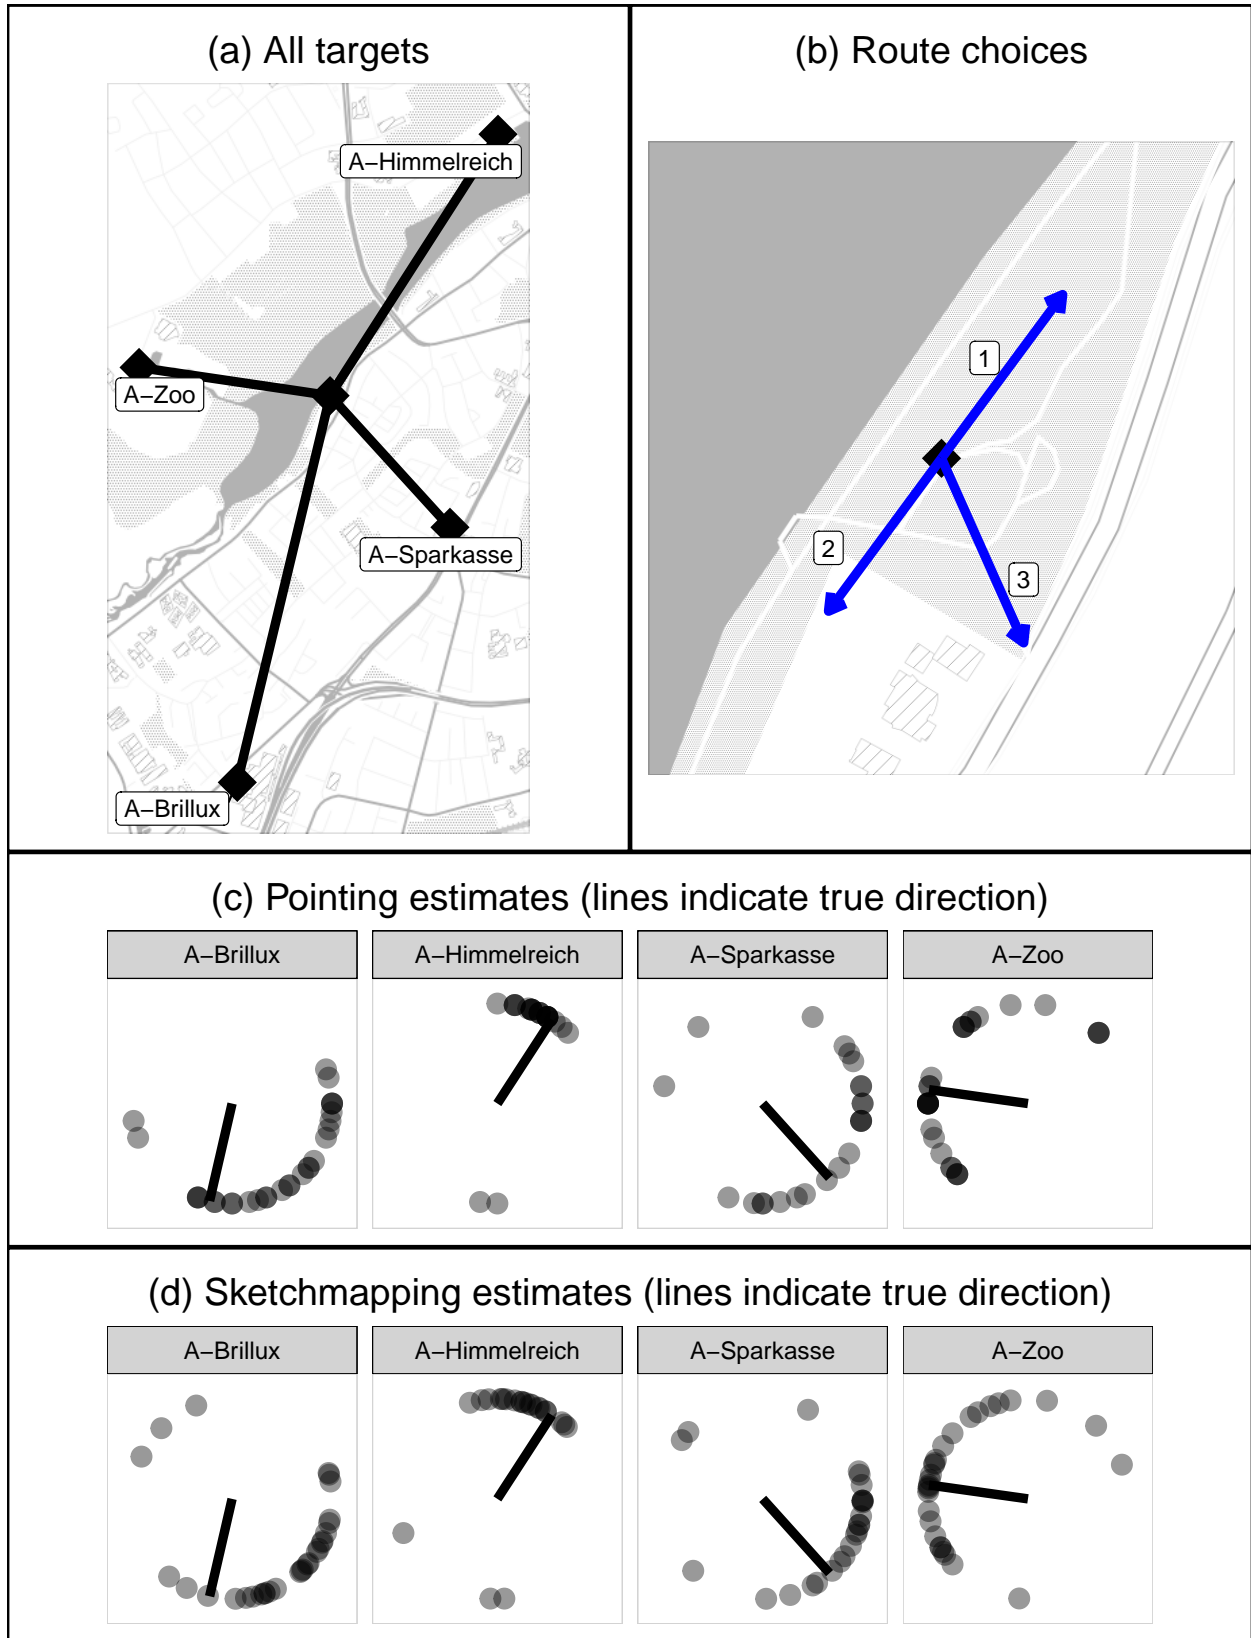

Map tiles by Stamen Design, under CC BY 3.0. Data by OpenStreetMap, under ODbL.

Location ID: B

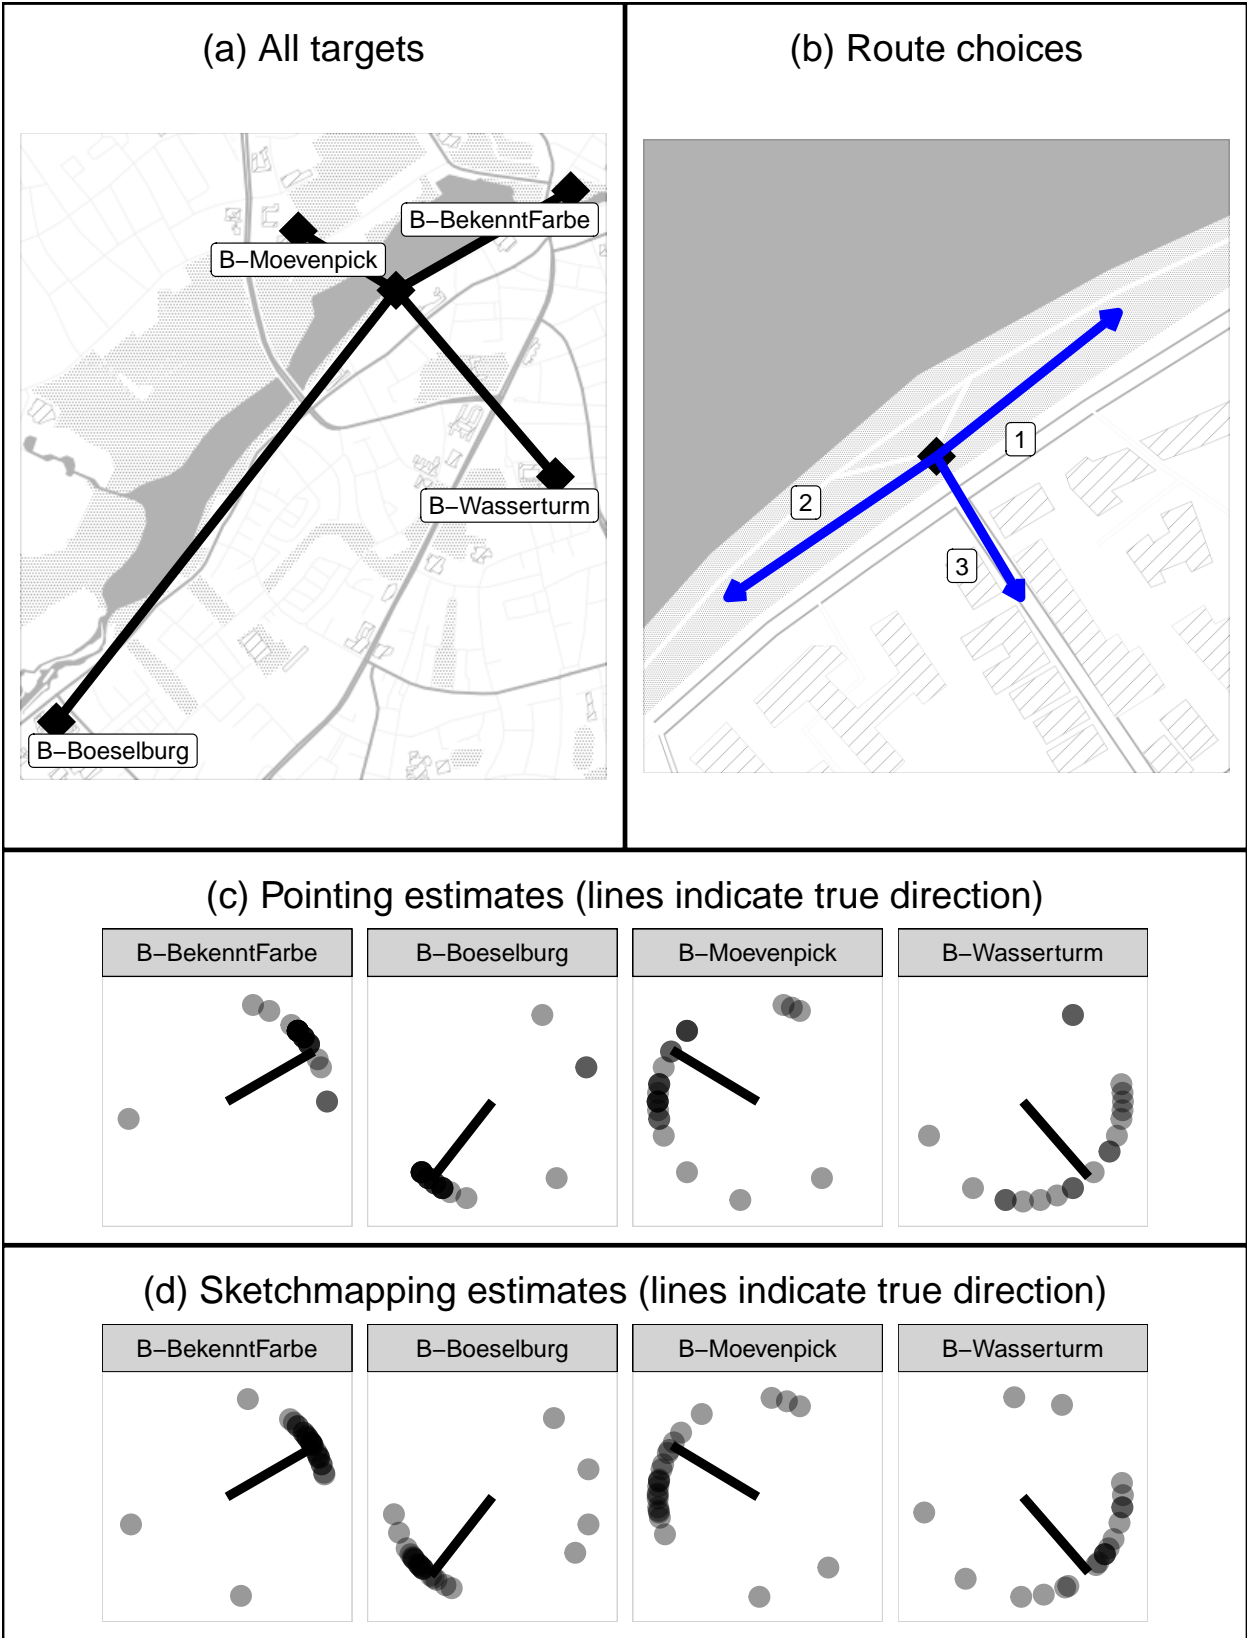

Map tiles by Stamen Design, under CC BY 3.0. Data by OpenStreetMap, under ODbL.

# Location ID: C

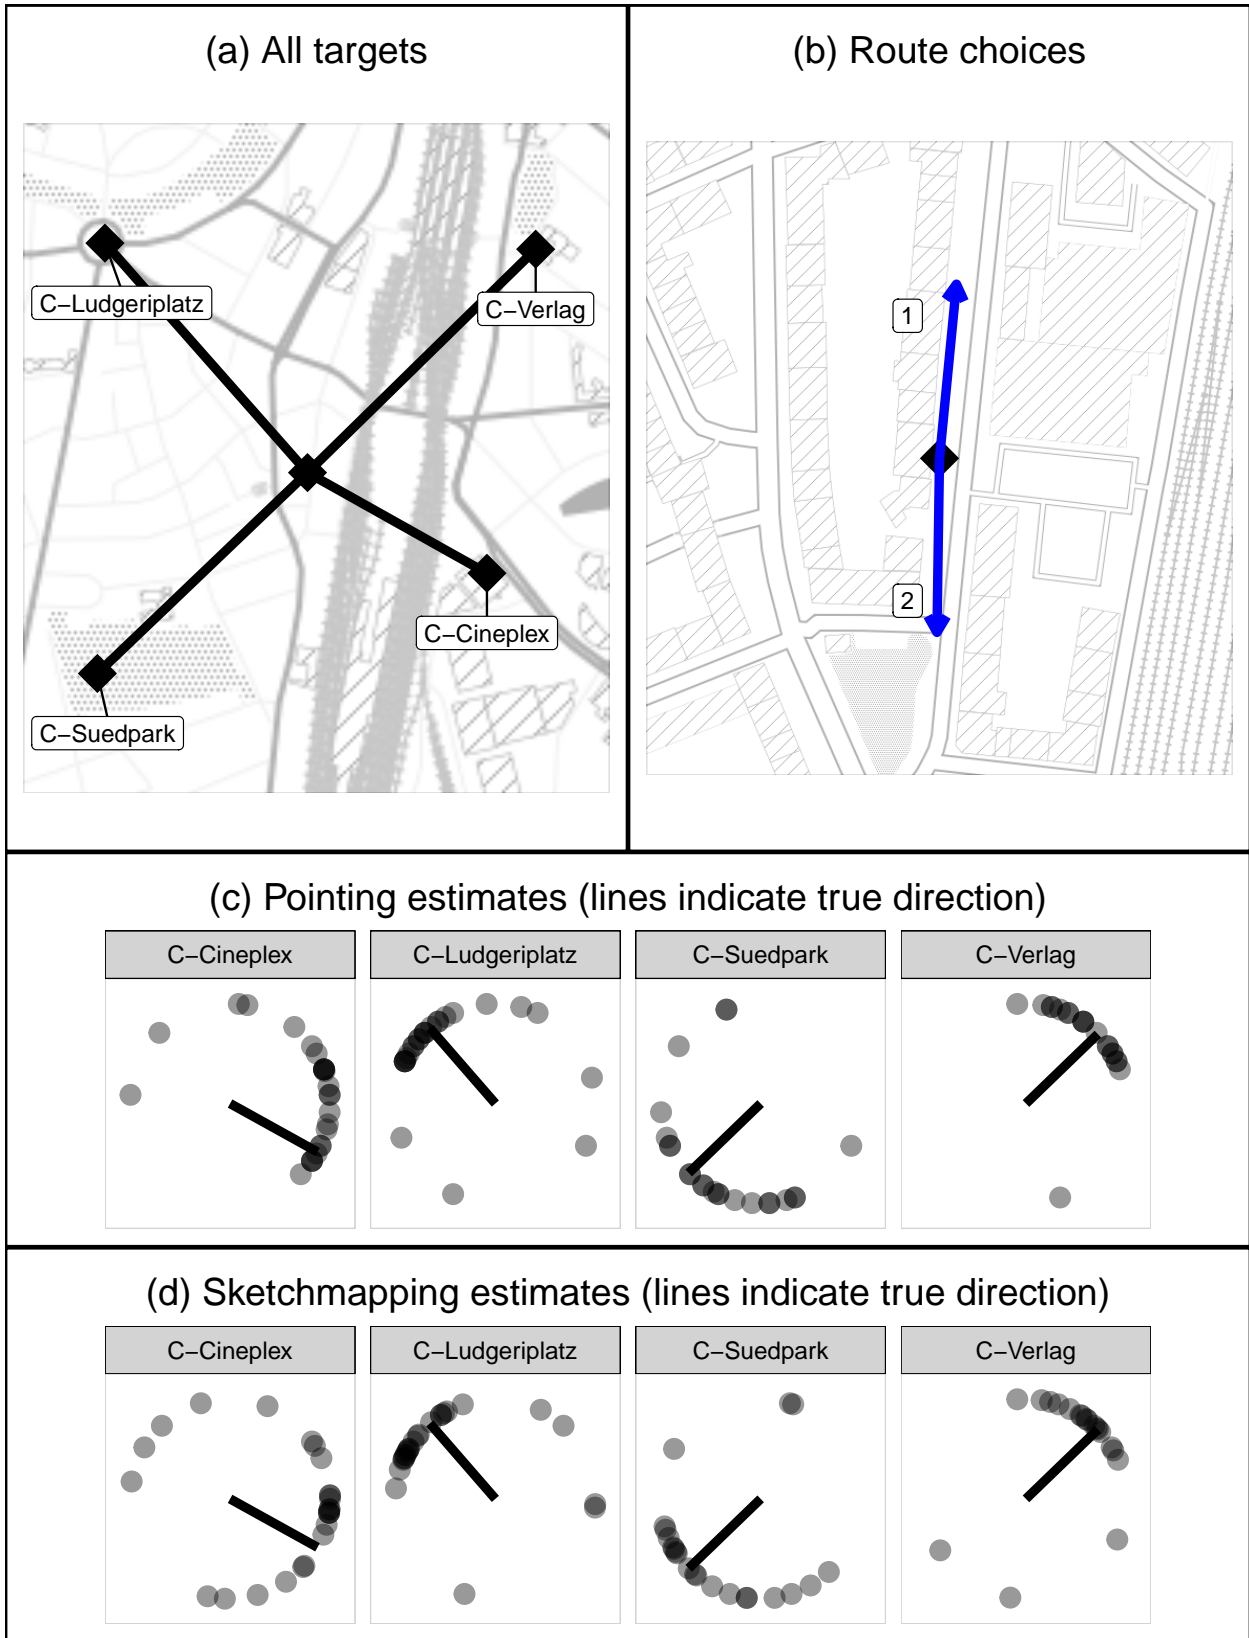

Map tiles by Stamen Design, under CC BY 3.0. Data by OpenStreetMap, under ODbL.

# Location ID: D

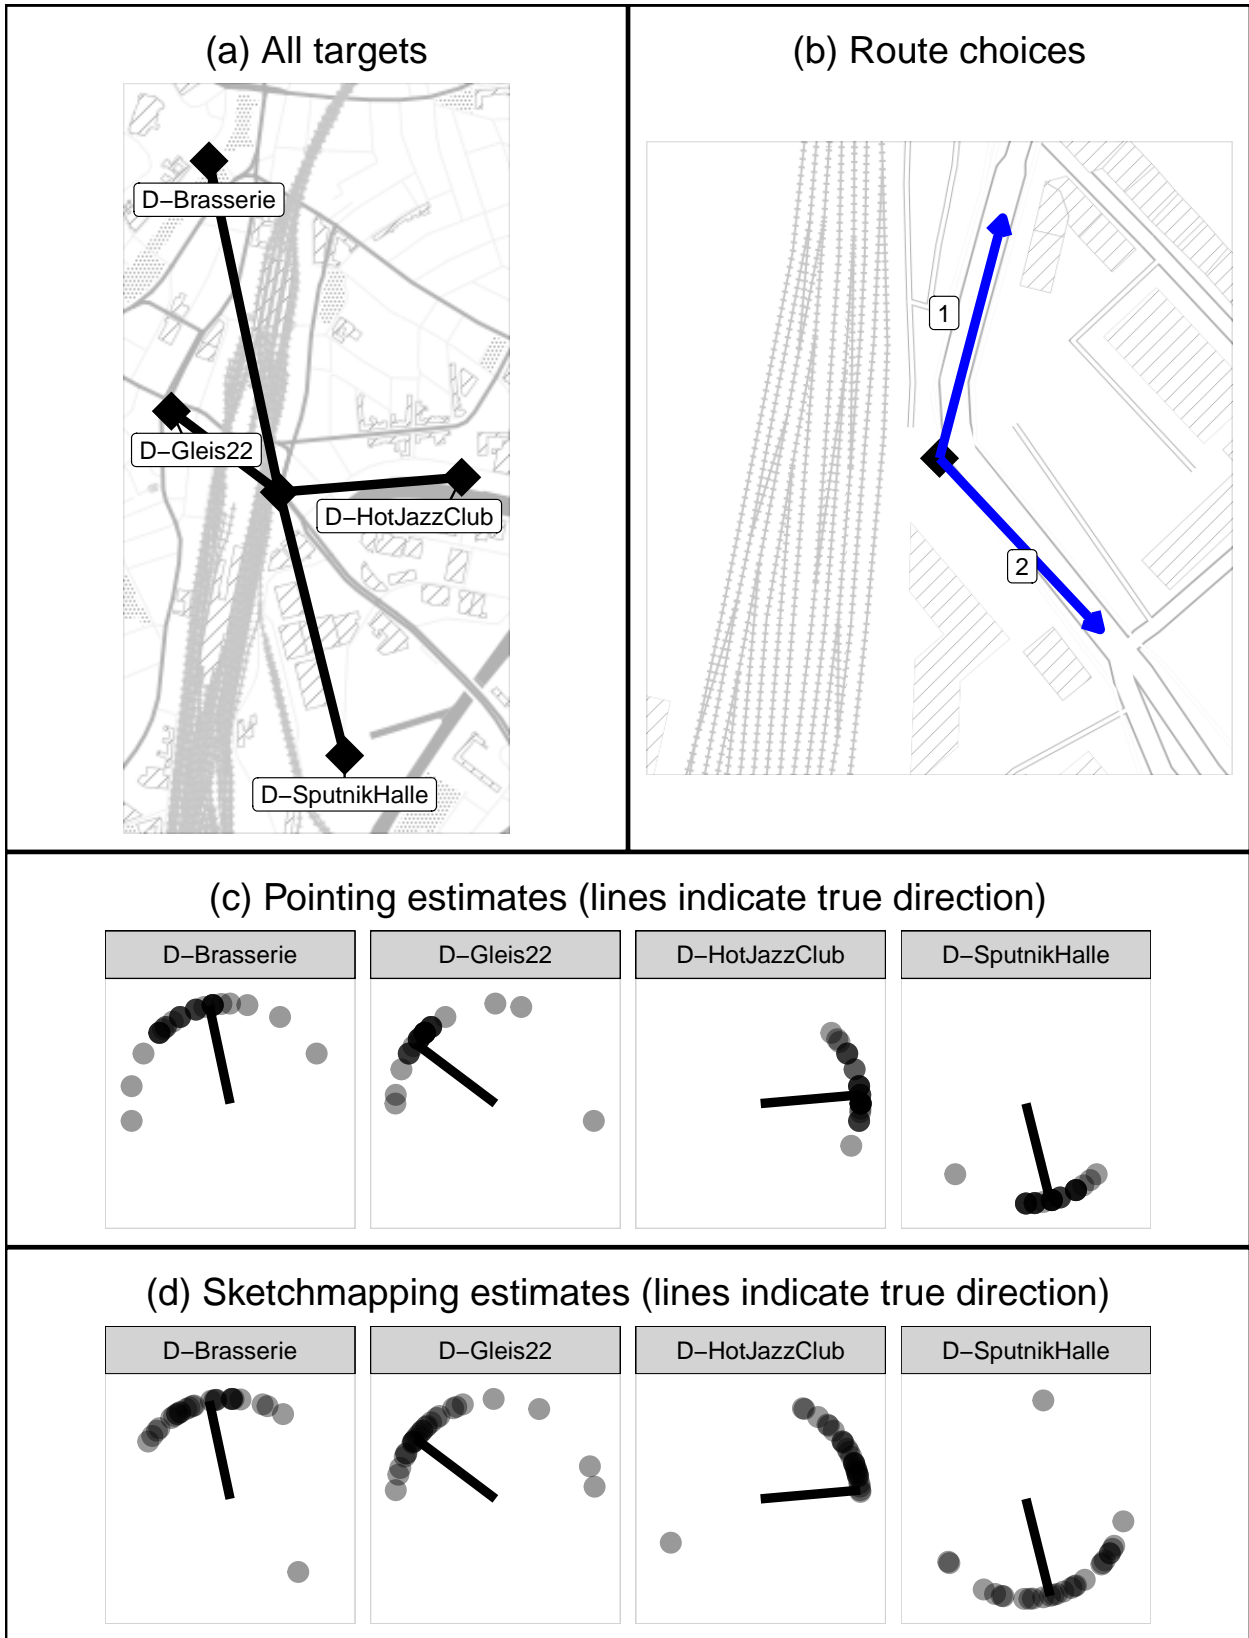

Map tiles by Stamen Design, under CC BY 3.0. Data by OpenStreetMap, under ODbL.

# Location ID: E

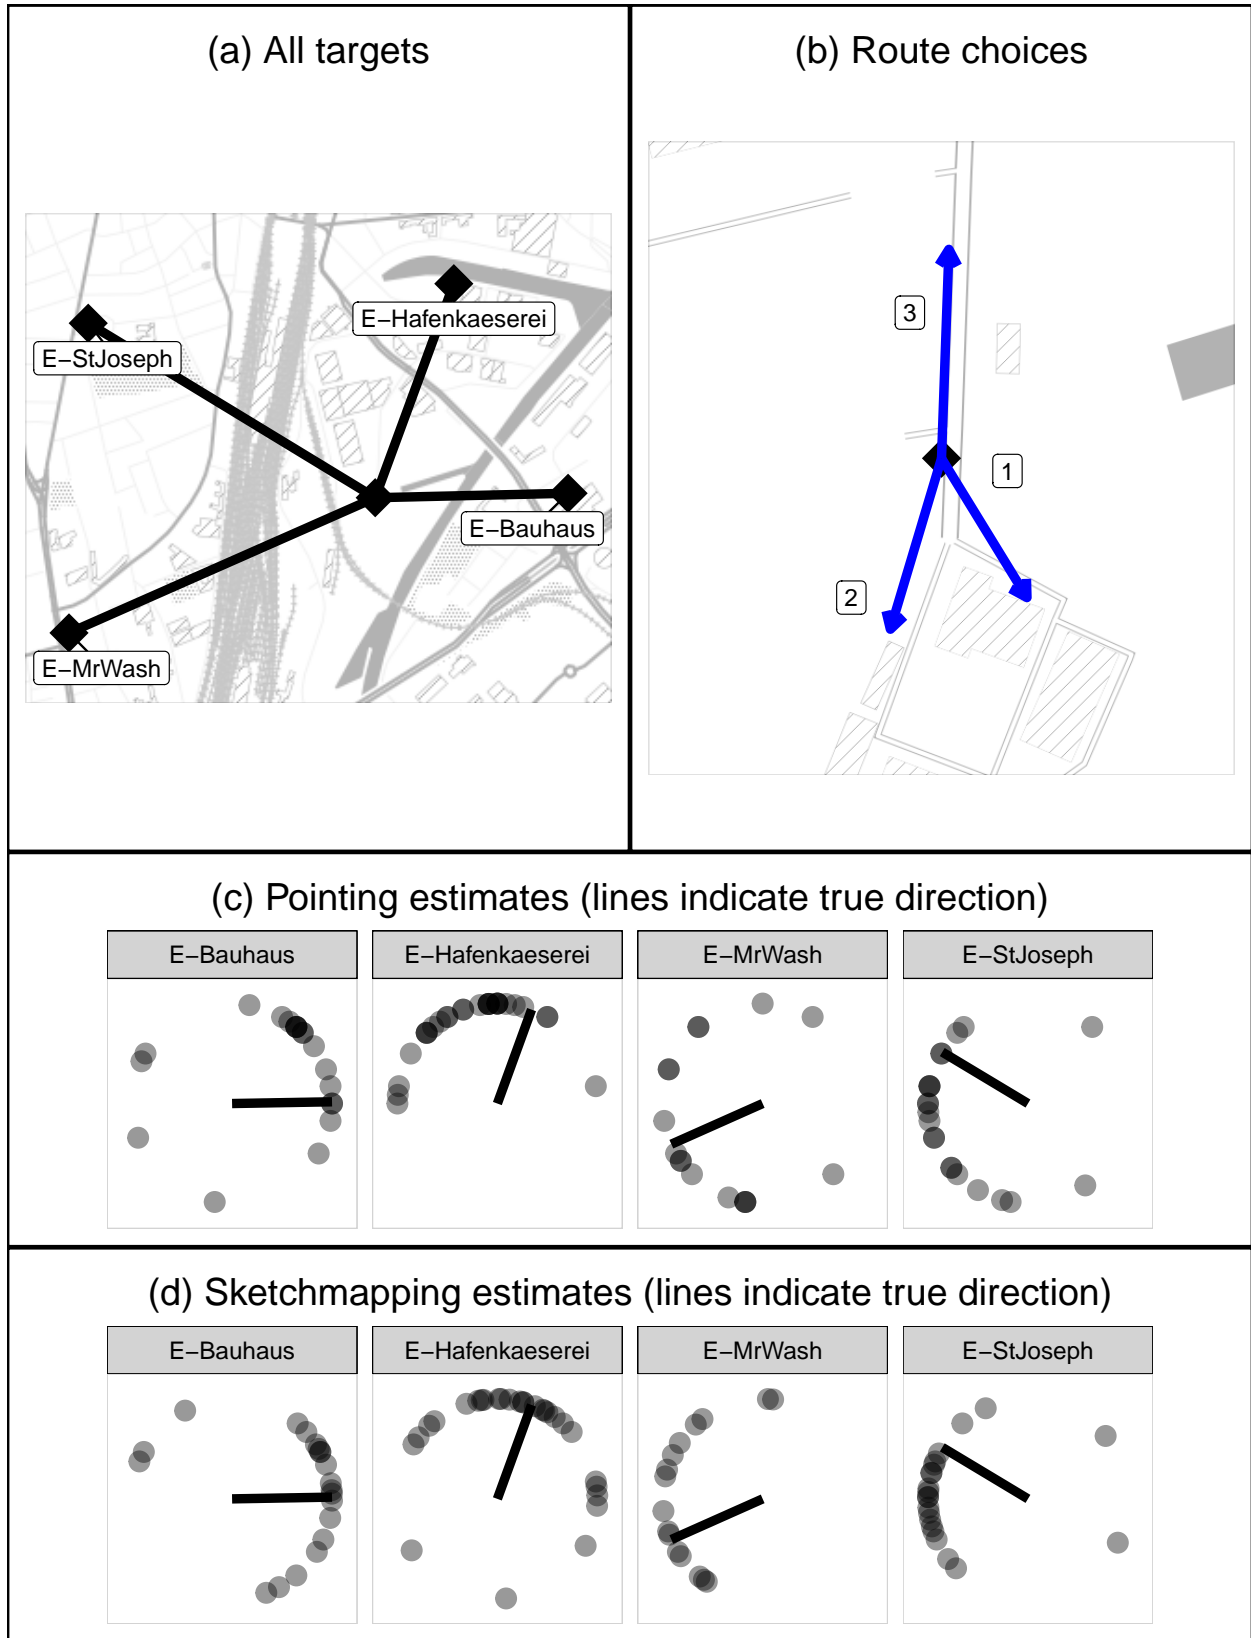

Map tiles by Stamen Design, under CC BY 3.0. Data by OpenStreetMap, under ODbL.

# Location ID: F

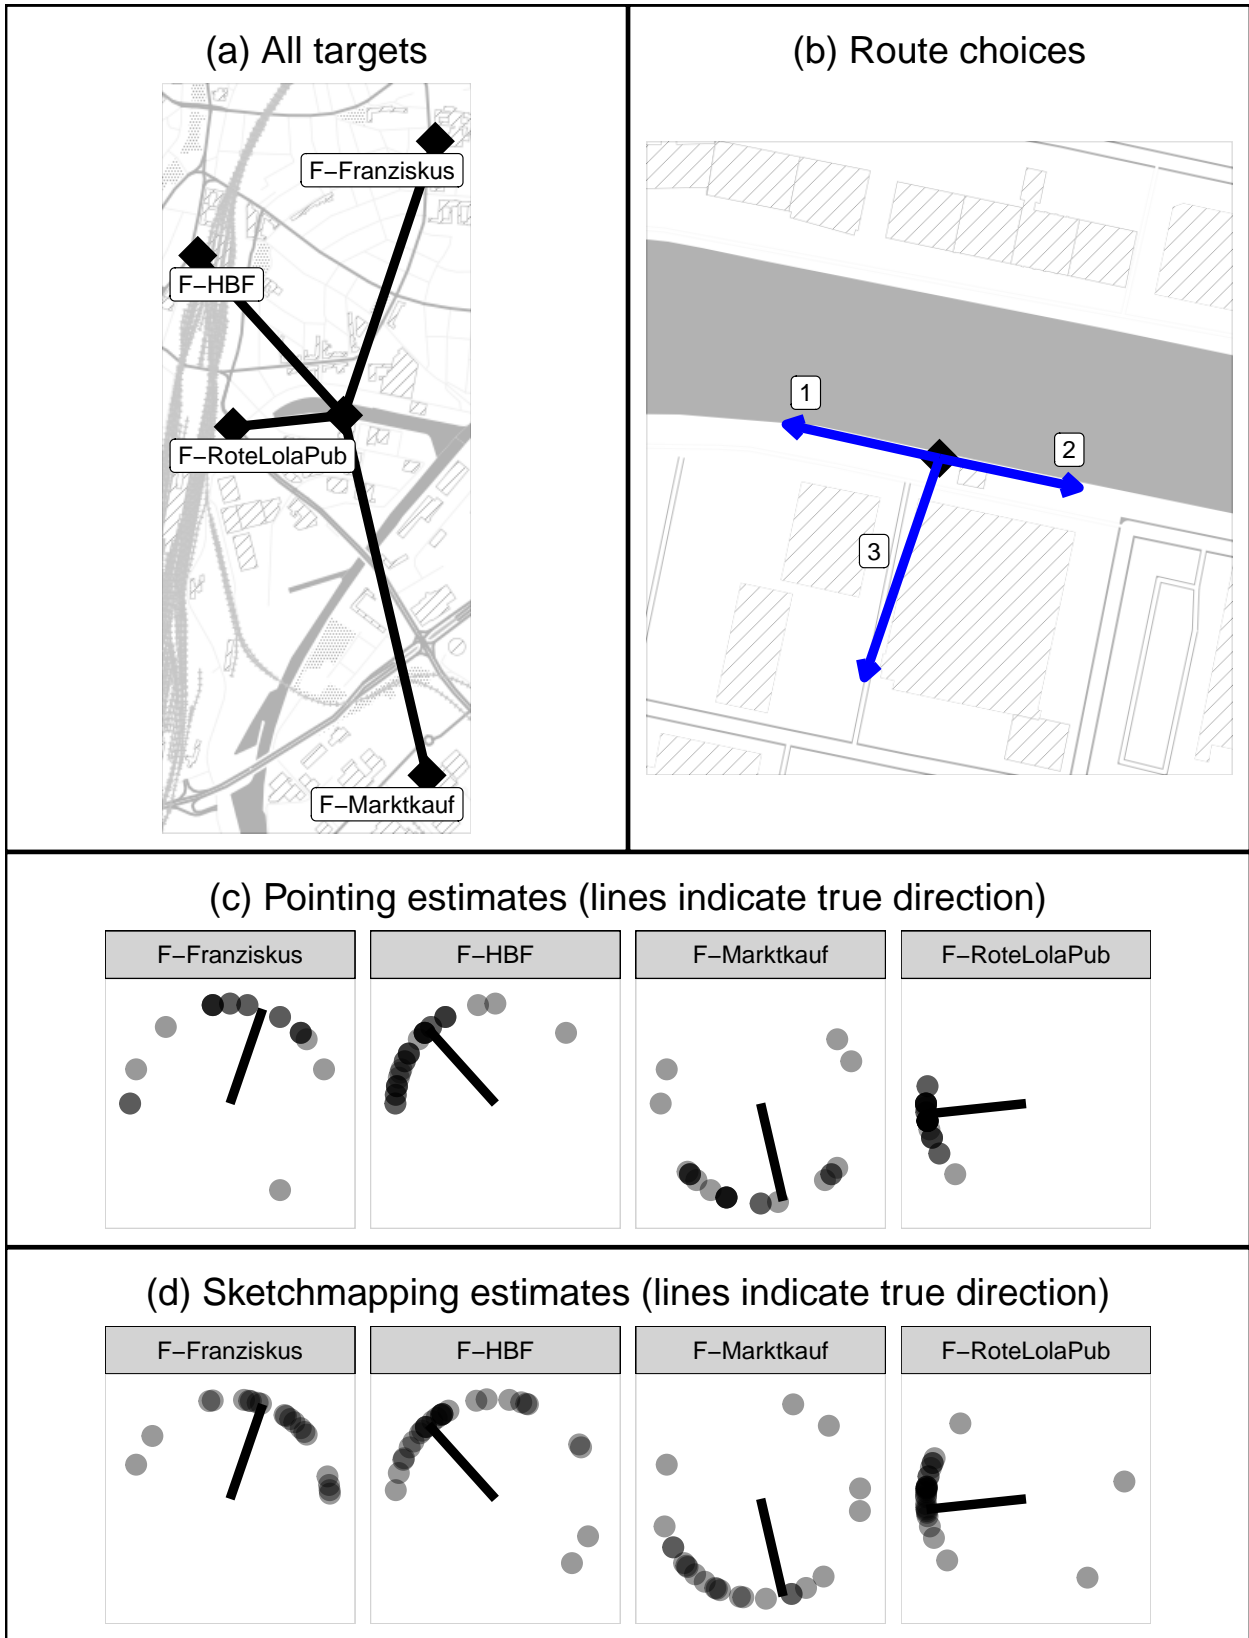

Map tiles by Stamen Design, under CC BY 3.0. Data by OpenStreetMap, under ODbL.
